# Supplementary material for: An eddy-covariance system with an innovative vortex intake for measuring carbon dioxide and water fluxes of ecosystems
Source: Copernicus journal article supplement (doi:10.5194/amt-10-1259-2017), 2017-03-30
Supplement: Supplementary file 1 [file amt-10-1259-2017-supplement.zip]

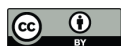

## *Supplement of*

# **An eddy-covariance system with an innovative vortex intake for measuring carbon dioxide and water fluxes of ecosystems**

**Jingyong Ma et al.**

*Correspondence to:* Tianshan Zha ([tianshanzha@bjfu.edu.cn](mailto:tianshanzha@bjfu.edu.cn))

- [amt-10-1259-2017-supplement-title-page.pdf](#)
- [Data.zip](#)

The copyright of individual parts of the supplement might differ from the CC-BY 3.0 licence.
